# Supplementary material
Source: publisher figshare collection journal article supplement (https://springernature.figshare.com/ndownloader/files/38336993)
Supplement: Supplementary file 1 [file 38336993]

#NEXUS
[R-package APE, Fri Nov 11 18:05:09 2022]
BEGIN TAXA;
	DIMENSIONS NTAX = 1136;
	TAXLABELS
		Zaglossus_bruijnii
		Tachyglossus_aculeatus
		Ornithorhynchus_anatinus
		Solenodon_paradoxus
		Solenodon_cubanus
		Galemys_pyrenaicus
		Scapanus_latimanus
		Scalopus_aquaticus
		Talpa_europaea
		Euroscaptor_mizura
		Euroscaptor_micrura
		Mogera_tokudae
		Mogera_imaizumii
		Mogera_wogura
		Euroscaptor_subanura
		Condylura_cristata
		Hylomys_suillus
		Echinosorex_gymnura
		Erinaceus_europaeus
		Paraechinus_micropus
		Hemiechinus_auritus
		Atelerix_algirus
		Scutisorex_somereni
		Suncus_madagascariensis
		Crocidura_crenata
		Crocidura_canariensis
		Sorex_araneus
		Sorex_minutus
		Cryptotis_parva
		Blarina_hylophaga
		Notiosorex_crawfordi
		Smutsia_gigantea
		Phataginus_tricuspis
		Manis_pentadactyla
		Urocyon_cinereoargenteus
		Vulpes_lagopus
		Vulpes_zerda
		Vulpes_vulpes
		Otocyon_megalotis
		Nyctereutes_procyonoides
		Lycaon_pictus
		Chrysocyon_brachyurus
		Canis_mesomelas
		Canis_simensis
		Canis_latrans
		Canis_aureus
		Canis_lupus
		Cuon_alpinus
		Canis_adustus
		Pseudalopex_gymnocercus
		Speothos_venaticus
		Cerdocyon_thous
		Neomonachus_tropicalis
		Monachus_monachus
		Mirounga_leonina
		Mirounga_angustirostris
		Lobodon_carcinophaga
		Leptonychotes_weddellii
		Ommatophoca_rossii
		Hydrurga_leptonyx
		Erignathus_barbatus
		Pagophilus_groenlandicus
		Phoca_vitulina
		Pusa_hispida
		Halichoerus_grypus
		Cystophora_cristata
		Odobenus_rosmarus
		Callorhinus_ursinus
		Zalophus_californianus
		Zalophus_japonicus
		Eumetopias_jubatus
		Arctocephalus_pusillus
		Neophoca_cinerea
		Otaria_bryonia
		Arctocephalus_tropicalis
		Arctocephalus_forsteri
		Arctocephalus_australis
		Mydaus_javanensis
		Spilogale_gracilis
		Mephitis_mephitis
		Conepatus_humboldtii
		Conepatus_chinga
		Potos_flavus
		Procyon_lotor
		Procyon_cancrivorus
		Bassariscus_astutus
		Nasua_nasua
		Nasua_narica
		Bassaricyon_alleni
		Taxidea_taxus
		Meles_meles
		Meles_anakuma
		Arctonyx_collaris
		Mellivora_capensis
		Gulo_gulo
		Martes_flavigula
		Martes_foina
		Martes_zibellina
		Martes_martes
		Martes_americana
		Martes_pennanti
		Eira_barbara
		Melogale_orientalis
		Neovison_vison
		Mustela_frenata
		Mustela_felipei
		Mustela_erminea
		Mustela_nivalis
		Mustela_sibirica
		Mustela_nigripes
		Mustela_lutreolina
		Mustela_putorius
		Ictonyx_libyca
		Galictis_vittata
		Lyncodon_patagonicus
		Galictis_cuja
		Pteronura_brasiliensis
		Lontra_longicaudis
		Lontra_provocax
		Lontra_canadensis
		Enhydra_lutris
		Lutra_maculicollis
		Lutra_lutra
		Aonyx_cinerea
		Lutrogale_perspicillata
		Aonyx_capensis
		Ailurus_fulgens
		Ursus_maritimus
		Ursus_arctos
		Melursus_ursinus
		Ursus_thibetanus
		Ursus_americanus
		Helarctos_malayanus
		Ailuropoda_melanoleuca
		Nandinia_binotata
		Hyaena_hyaena
		Hyaena_brunnea
		Proteles_cristata
		Crocuta_crocuta
		Eupleres_goudotii
		Salanoia_concolor
		Galidictis_fasciata
		Galidia_elegans
		Cryptoprocta_ferox
		Herpestes_vitticollis
		Herpestes_javanicus
		Herpestes_edwardsii
		Herpestes_ichneumon
		Ichneumia_albicauda
		Cynictis_penicillata
		Bdeogale_crassicauda
		Crossarchus_obscurus
		Helogale_parvula
		Liberiictis_kuhni
		Mungos_mungo
		Suricata_suricatta
		Genetta_maculata
		Genetta_tigrina
		Genetta_genetta
		Genetta_servalina
		Viverricula_indica
		Viverra_tangalunga
		Viverra_zibetha
		Civettictis_civetta
		Macrogalidia_musschenbroekii
		Cynogale_bennettii
		Hemigalus_derbyanus
		Paradoxurus_hermaphroditus
		Arctictis_binturong
		Prionodon_pardicolor
		Prionodon_linsang
		Neofelis_nebulosa
		Panthera_tigris
		Panthera_onca
		Panthera_uncia
		Panthera_pardus
		Panthera_leo
		Lynx_rufus
		Lynx_lynx
		Lynx_canadensis
		Acinonyx_jubatus
		Puma_concolor
		Felis_catus
		Felis_silvestris
		Leopardus_pardalis
		Leopardus_wiedii
		Leopardus_tigrinus
		Prionailurus_bengalensis
		Leptailurus_serval
		Caracal_caracal
		Equus_africanus
		Equus_grevyi
		Equus_quagga
		Equus_zebra
		Equus_hemionus
		Equus_caballus
		Equus_ferus
		Tapirus_indicus
		Tapirus_terrestris
		Tapirus_bairdii
		Rhinoceros_unicornis
		Rhinoceros_sondaicus
		Dicerorhinus_sumatrensis
		Diceros_bicornis
		Ceratotherium_simum
		Vicugna_pacos
		Vicugna_vicugna
		Lama_glama
		Camelus_dromedarius
		Camelus_ferus
		Tayassu_pecari
		Pecari_tajacu
		Sus_scrofa
		Sus_barbatus
		Potamochoerus_porcus
		Phacochoerus_africanus
		Phacochoerus_aethiopicus
		Hylochoerus_meinertzhageni
		Babyrousa_babyrussa
		Hippopotamus_amphibius
		Choeropsis_liberiensis
		Indopacetus_pacificus
		Kogia_sima
		Kogia_breviceps
		Physeter_macrocephalus
		Platanista_gangetica
		Pontoporia_blainvillei
		Inia_geoffrensis
		Inia_araguaiaensis
		Lipotes_vexillifer
		Delphinapterus_leucas
		Mesoplodon_bowdoini
		Monodon_monoceros
		Neophocaena_phocaenoides
		Phocoenoides_dalli
		Phocoena_phocoena
		Phocoena_spinipinnis
		Phocoena_dioptrica
		Lagenorhynchus_acutus
		Lagenorhynchus_albirostris
		Orcinus_orca
		Orcaella_brevirostris
		Grampus_griseus
		Pseudorca_crassidens
		Peponocephala_electra
		Globicephala_melas
		Globicephala_macrorhynchus
		Feresa_attenuata
		Steno_bredanensis
		Sotalia_guianensis
		Sotalia_fluviatilis
		Tursiops_truncatus
		Stenella_attenuata
		Lagenodelphis_hosei
		Stenella_longirostris
		Sousa_chinensis
		Tursiops_aduncus
		Stenella_frontalis
		Stenella_coeruleoalba
		Stenella_clymene
		Delphinus_delphis
		Delphinus_capensis
		Lagenorhynchus_obscurus
		Lagenorhynchus_obliquidens
		Lagenorhynchus_cruciger
		Lagenorhynchus_australis
		Cephalorhynchus_hectori
		Cephalorhynchus_heavisidii
		Cephalorhynchus_eutropia
		Cephalorhynchus_commersonii
		Berardius_bairdii
		Berardius_arnuxii
		Mesoplodon_bidens
		Ziphius_cavirostris
		Mesoplodon_stejnegeri
		Hyperoodon_planifrons
		Hyperoodon_ampullatus
		Mesoplodon_hectori
		Mesoplodon_carlhubbsi
		Mesoplodon_layardii
		Mesoplodon_mirus
		Mesoplodon_europaeus
		Mesoplodon_densirostris
		Mesoplodon_grayi
		Tasmacetus_shepherdi
		Eubalaena_glacialis
		Eubalaena_japonica
		Balaenoptera_physalus
		Balaenoptera_musculus
		Balaenoptera_omurai
		Balaenoptera_borealis
		Balaenoptera_edeni
		Mesoplodon_perrini
		Balaenoptera_bonaerensis
		Mesoplodon_peruvianus
		Lissodelphis_peronii
		Lissodelphis_borealis
		Balaena_mysticetus
		Caperea_marginata
		Balaenoptera_acutorostrata
		Mesoplodon_ginkgodens
		Megaptera_novaeangliae
		Eschrichtius_robustus
		Moschiola_meminna
		Moschiola_indica
		Tragulus_javanicus
		Tragulus_kanchil
		Tragulus_napu
		Okapia_johnstoni
		Giraffa_camelopardalis
		Antilocapra_americana
		Muntiacus_muntjak
		Dama_dama
		Elaphurus_davidianus
		Rusa_unicolor
		Cervus_elaphus
		Axis_calamianensis
		Axis_axis
		Rangifer_tarandus
		Odocoileus_virginianus
		Odocoileus_hemionus
		Mazama_gouazoubira
		Blastocerus_dichotomus
		Pudu_puda
		Hydropotes_inermis
		Capreolus_capreolus
		Alces_alces
		Moschus_moschiferus
		Moschus_berezovskii
		Boselaphus_tragocamelus
		Tetracerus_quadricornis
		Tragelaphus_imberbis
		Tragelaphus_angasii
		Tragelaphus_scriptus
		Tragelaphus_eurycerus
		Tragelaphus_spekii
		Tragelaphus_buxtoni
		Tragelaphus_strepsiceros
		Syncerus_caffer
		Bubalus_mindorensis
		Bubalus_depressicornis
		Bubalus_arnee
		Bos_gaurus
		Bos_taurus
		Bos_indicus
		Bison_bonasus
		Bos_mutus
		Bos_grunniens
		Bison_bison
		Nesotragus_moschatus
		Aepyceros_melampus
		Pelea_capreolus
		Redunca_fulvorufula
		Redunca_redunca
		Redunca_arundinum
		Kobus_megaceros
		Kobus_leche
		Kobus_vardonii
		Kobus_kob
		Kobus_ellipsiprymnus
		Ourebia_ourebi
		Raphicerus_melanotis
		Raphicerus_sharpei
		Raphicerus_campestris
		Madoqua_kirkii
		Madoqua_guentheri
		Saiga_tatarica
		Nanger_granti
		Eudorcas_rufifrons
		Gazella_dorcas
		Gazella_gazella
		Gazella_spekei
		Antilope_cervicapra
		Litocranius_walleri
		Antidorcas_marsupialis
		Neotragus_pygmaeus
		Oreotragus_oreotragus
		Philantomba_monticola
		Sylvicapra_grimmia
		Cephalophus_silvicultor
		Cephalophus_dorsalis
		Cephalophus_leucogaster
		Cephalophus_nigrifrons
		Cephalophus_natalensis
		Cephalophus_weynsi
		Ovibos_moschatus
		Capricornis_crispus
		Ovis_canadensis
		Ovis_orientalis
		Ovis_aries
		Ovis_ammon
		Capra_ibex
		Capra_hircus
		Pseudois_nayaur
		Myotragus_balearicus
		Oreamnos_americanus
		Rupicapra_rupicapra
		Ammotragus_lervia
		Connochaetes_taurinus
		Connochaetes_gnou
		Damaliscus_pygargus
		Damaliscus_lunatus
		Beatragus_hunteri
		Alcelaphus_buselaphus
		Hippotragus_niger
		Hippotragus_equinus
		Oryx_dammah
		Oryx_leucoryx
		Oryx_gazella
		Oryx_beisa
		Rhinopoma_hardwickii
		Rhinopoma_microphyllum
		Lavia_frons
		Megaderma_spasma
		Rhinolophus_hipposideros
		Asellia_tridens
		Hipposideros_caffer
		Hipposideros_diadema
		Cynopterus_titthaecheilus
		Cynopterus_brachyotis
		Epomops_franqueti
		Hypsignathus_monstrosus
		Rousettus_aegyptiacus
		Eidolon_helvum
		Pteropus_giganteus
		Pteropus_rufus
		Pteropus_vampyrus
		Macroglossus_minimus
		Myzopoda_aurita
		Mystacina_tuberculata
		Thyroptera_discifera
		Noctilio_leporinus
		Pteronotus_parnellii
		Mormoops_megalophylla
		Micronycteris_microtis
		Anoura_caudifer
		Glossophaga_soricina
		Glossophaga_morenoi
		Phylloderma_stenops
		Phyllostomus_discolor
		Lonchorhina_inusitata
		Chrotopterus_auritus
		Vampyrum_spectrum
		Lonchophylla_inexpectata
		Carollia_perspicillata
		Artibeus_jamaicensis
		Artibeus_planirostris
		Pygoderma_bilabiatum
		Vampyressa_pusilla
		Sturnira_erythromos
		Sturnira_aratathomasi
		Rhinophylla_pumilio
		Lonchorhina_orinocensis
		Lonchorhina_fernandezi
		Lonchorhina_marinkellei
		Lonchorhina_aurita
		Diphylla_ecaudata
		Desmodus_rotundus
		Diaemus_youngi
		Macrotus_waterhousii
		Macrotus_californicus
		Nyctinomops_macrotis
		Molossus_molossus
		Promops_nasutus
		Molossops_temminckii
		Cynomops_planirostris
		Eumops_perotis
		Tadarida_brasiliensis
		Molossus_currentium
		Myotis_daubentonii
		Myotis_keaysi
		Myotis_velifer
		Myotis_chiloensis
		Myotis_lucifugus
		Myotis_evotis
		Eptesicus_nilssonii
		Eptesicus_serotinus
		Histiotus_montanus
		Histiotus_magellanicus
		Eptesicus_diminutus
		Lasionycteris_noctivagans
		Pipistrellus_pipistrellus
		Nyctalus_noctula
		Vespertilio_murinus
		Chalinolobus_tuberculatus
		Neoromicia_nana
		Lasiurus_cinereus
		Lasiurus_ega
		Antrozous_pallidus
		Otonycteris_hemprichii
		Plecotus_auritus
		Euderma_maculatum
		Barbastella_barbastellus
		Miniopterus_schreibersii
		Nycteris_javanica
		Nycteris_thebaica
		Saccopteryx_bilineata
		Peropteryx_leucoptera
		Balantiopteryx_plicata
		Galeopterus_variegatus
		Cynocephalus_volans
		Nycticebus_coucang
		Loris_tardigradus
		Otolemur_garnettii
		Otolemur_crassicaudatus
		Galago_senegalensis
		Euoticus_elegantulus
		Perodicticus_potto
		Arctocebus_calabarensis
		Daubentonia_madagascariensis
		Indri_indri
		Propithecus_diadema
		Propithecus_verreauxi
		Propithecus_coquereli
		Avahi_laniger
		Varecia_variegata
		Lemur_catta
		Hapalemur_griseus
		Eulemur_macaco
		Eulemur_rubriventer
		Eulemur_mongoz
		Eulemur_collaris
		Eulemur_fulvus
		Eulemur_sanfordi
		Eulemur_albifrons
		Lepilemur_mustelinus
		Cheirogaleus_medius
		Microcebus_murinus
		Microcebus_rufus
		Tarsius_syrichta
		Pithecia_irrorata
		Pithecia_monachus
		Pithecia_pithecia
		Cacajao_melanocephalus
		Callicebus_moloch
		Leontocebus_nigricollis
		Saguinus_oedipus
		Leontopithecus_rosalia
		Mico_humeralifer
		Callithrix_jacchus
		Cebuella_pygmaea
		Saimiri_sciureus
		Cebus_olivaceus
		Cebus_albifrons
		Cebus_capucinus
		Aotus_azarae
		Aotus_nancymaae
		Alouatta_seniculus
		Alouatta_caraya
		Alouatta_palliata
		Alouatta_pigra
		Lagothrix_lagotricha
		Brachyteles_hypoxanthus
		Brachyteles_arachnoides
		Ateles_geoffroyi
		Ateles_fusciceps
		Ateles_paniscus
		Ateles_chamek
		Ateles_belzebuth
		Symphalangus_syndactylus
		Hylobates_pileatus
		Hylobates_lar
		Hylobates_muelleri
		Hylobates_moloch
		Hylobates_klossii
		Hylobates_agilis
		Nomascus_concolor
		Nomascus_gabriellae
		Nomascus_leucogenys
		Hoolock_hoolock
		Pongo_pygmaeus
		Pongo_abelii
		Pan_troglodytes
		Pan_paniscus
		Homo_sapiens
		Gorilla_gorilla
		Gorilla_beringei
		Semnopithecus_schistaceus
		Trachypithecus_cristatus
		Trachypithecus_phayrei
		Semnopithecus_entellus
		Presbytis_rubicunda
		Presbytis_melalophos
		Rhinopithecus_bieti
		Rhinopithecus_roxellana
		Nasalis_larvatus
		Colobus_guereza
		Colobus_vellerosus
		Macaca_leonina
		Macaca_sinica
		Macaca_silenus
		Macaca_nemestrina
		Macaca_maura
		Macaca_radiata
		Macaca_fascicularis
		Macaca_arctoides
		Macaca_nigra
		Macaca_fuscata
		Macaca_mulatta
		Macaca_sylvanus
		Theropithecus_gelada
		Papio_cynocephalus
		Papio_papio
		Papio_hamadryas
		Papio_anubis
		Lophocebus_aterrimus
		Lophocebus_albigena
		Cercocebus_atys
		Mandrillus_sphinx
		Mandrillus_leucophaeus
		Cercopithecus_mitis
		Cercopithecus_ascanius
		Erythrocebus_patas
		Chlorocebus_pygerythrus
		Chlorocebus_aethiops
		Chlorocebus_cynosuros
		Chlorocebus_sabaeus
		Miopithecus_talapoin
		Ptilocercus_lowii
		Tupaia_glis
		Tupaia_nicobarica
		Urogale_everetti
		Tupaia_tana
		Dendrogale_melanura
		Anathana_ellioti
		Sylvilagus_audubonii
		Oryctolagus_cuniculus
		Pentalagus_furnessi
		Lepus_californicus
		Lepus_alleni
		Lepus_townsendii
		Lepus_timidus
		Lepus_europaeus
		Lepus_americanus
		Nesolagus_timminsi
		Nesolagus_netscheri
		Ochotona_hyperborea
		Ochotona_princeps
		Muscardinus_avellanarius
		Aplodontia_rufa
		Ratufa_indica
		Callosciurus_erythraeus
		Tamias_striatus
		Tamias_minimus
		Spermophilus_dauricus
		Ictidomys_tridecemlineatus
		Cynomys_ludovicianus
		Marmota_monax
		Marmota_caligata
		Marmota_marmota
		Marmota_sibirica
		Sciurus_anomalus
		Sciurus_niger
		Sciurus_carolinensis
		Sciurus_griseus
		Microsciurus_mimulus
		Microsciurus_alfari
		Microsciurus_flaviventer
		Sciurus_vulgaris
		Tamiasciurus_hudsonicus
		Glaucomys_volans
		Petaurista_leucogenys
		Petaurista_philippensis
		Petaurista_alborufus
		Petaurista_grandis
		Laonastes_aenigmamus
		Atherurus_macrourus
		Hystrix_javanica
		Hystrix_cristata
		Thryonomys_swinderianus
		Heterocephalus_glaber
		Heliophobius_argenteocinereus
		Cryptomys_hottentotus
		Georychus_capensis
		Bathyergus_suillus
		Cuniculus_paca
		Myoprocta_acouchy
		Dasyprocta_leporina
		Dasyprocta_azarae
		Hydrochoerus_hydrochaeris
		Dolichotis_patagonum
		Cavia_porcellus
		Cavia_aperea
		Erethizon_dorsatum
		Coendou_prehensilis
		Lagostomus_maximus
		Chinchilla_lanigera
		Chinchilla_chinchilla
		Phyllomys_sulinus
		Myocastor_coypus
		Capromys_pilorides
		Ctenomys_boliviensis
		Ctenomys_talarum
		Octodon_degus
		Spalacopus_cyanus
		Dipus_sagitta
		Jaculus_orientalis
		Jaculus_jaculus
		Stylodipus_telum
		Allactaga_euphratica
		Allactaga_major
		Zapus_princeps
		Sicista_concolor
		Spalax_leucodon
		Rhizomys_pruinosus
		Dicrostonyx_groenlandicus
		Ondatra_zibethicus
		Lemmus_sibiricus
		Synaptomys_cooperi
		Ellobius_talpinus
		Microtus_arvalis
		Microtus_pennsylvanicus
		Microtus_ochrogaster
		Microtus_chrotorrhinus
		Microtus_oeconomus
		Myodes_gapperi
		Mesocricetus_auratus
		Tscherskia_triton
		Cricetus_cricetus
		Cricetulus_migratorius
		Cricetulus_longicaudatus
		Cricetulus_barabensis
		Phodopus_sungorus
		Neotoma_fuscipes
		Neotoma_lepida
		Neotoma_floridana
		Neotoma_albigula
		Neotoma_mexicana
		Neotoma_cinerea
		Hodomys_alleni
		Nelsonia_neotomodon
		Xenomys_nelsoni
		Ochrotomys_nuttalli
		Reithrodontomys_creper
		Reithrodontomys_mexicanus
		Reithrodontomys_fulvescens
		Reithrodontomys_sumichrasti
		Reithrodontomys_megalotis
		Reithrodontomys_humulis
		Reithrodontomys_montanus
		Isthmomys_pirrensis
		Isthmomys_flavidus
		Onychomys_torridus
		Onychomys_leucogaster
		Peromyscus_maniculatus
		Peromyscus_leucopus
		Megadontomys_thomasi
		Peromyscus_yucatanicus
		Peromyscus_guatemalensis
		Peromyscus_mexicanus
		Peromyscus_megalops
		Peromyscus_melanophrys
		Habromys_lepturus
		Habromys_lophurus
		Peromyscus_crinitus
		Peromyscus_ochraventer
		Peromyscus_truei
		Peromyscus_difficilis
		Peromyscus_attwateri
		Peromyscus_furvus
		Peromyscus_spicilegus
		Peromyscus_boylii
		Podomys_floridanus
		Neotomodon_alstoni
		Peromyscus_californicus
		Peromyscus_eremicus
		Osgoodomys_banderanus
		Scotinomys_xerampelinus
		Scotinomys_teguina
		Baiomys_taylori
		Baiomys_musculus
		Tylomys_panamensis
		Tylomys_mirae
		Tylomys_watsoni
		Tylomys_fulviventer
		Tylomys_nudicaudus
		Ototylomys_phyllotis
		Nyctomys_sumichrasti
		Chibchanomys_trichotis
		Reithrodon_auritus
		Rheomys_underwoodi
		Rheomys_thomasi
		Rheomys_mexicanus
		Rheomys_raptor
		Ichthyomys_pittieri
		Ichthyomys_hydrobates
		Ichthyomys_tweedii
		Neusticomys_venezuelae
		Neusticomys_ferreirai
		Neusticomys_monticolus
		Anotomys_leander
		Chinchillula_sahamae
		Sigmodon_leucotis
		Sigmodon_fulviventer
		Sigmodon_alleni
		Sigmodon_ochrognathus
		Sigmodon_hispidus
		Rhipidomys_macconnelli
		Rhipidomys_nitela
		Rhipidomys_mastacalis
		Rhipidomys_fulviventer
		Rhipidomys_venustus
		Rhipidomys_couesi
		Rhipidomys_venezuelae
		Rhipidomys_latimanus
		Rhipidomys_austrinus
		Aepeomys_lugens
		Thomasomys_gracilis
		Thomasomys_cinereus
		Thomasomys_rhoadsi
		Thomasomys_baeops
		Thomasomys_aureus
		Thomasomys_pyrrhonotus
		Thomasomys_daphne
		Thomasomys_oreas
		Thomasomys_hylophilus
		Thomasomys_paramorum
		Chilomys_instans
		Akodon_bogotensis
		Blarinomys_breviceps
		Scapteromys_tumidus
		Scapteromys_meridionalis
		Scapteromys_aquaticus
		Kunsia_tomentosus
		Thalpomys_lasiotis
		Necromys_amoenus
		Necromys_urichi
		Necromys_lasiurus
		Necromys_temchuki
		Necromys_obscurus
		Necromys_lactens
		Akodon_mimus
		Akodon_azarae
		Akodon_boliviensis
		Akodon_subfuscus
		Akodon_lutescens
		Akodon_cursor
		Akodon_simulator
		Akodon_albiventer
		Akodon_mollis
		Akodon_torques
		Akodon_aerosus
		Deltamys_kempi
		Thaptomys_nigrita
		Oxymycterus_delator
		Oxymycterus_paramensis
		Oxymycterus_rufus
		Oxymycterus_inca
		Zygodontomys_brevicauda
		Oecomys_concolor
		Oecomys_roberti
		Oecomys_bicolor
		Oecomys_superans
		Oecomys_trinitatis
		Oecomys_mamorae
		Oecomys_paricola
		Transandinomys_talamancae
		Transandinomys_bolivaris
		Euryoryzomys_nitidus
		Euryoryzomys_russatus
		Euryoryzomys_legatus
		Nephelomys_albigularis
		Nephelomys_keaysi
		Hylaeamys_megacephalus
		Handleyomys_alfaroi
		Handleyomys_melanotis
		Handleyomys_chapmani
		Neacomys_guianae
		Neacomys_spinosus
		Neacomys_tenuipes
		Microryzomys_minutus
		Microryzomys_altissimus
		Oligoryzomys_microtis
		Oligoryzomys_nigripes
		Oligoryzomys_destructor
		Oligoryzomys_fulvescens
		Oligoryzomys_eliurus
		Oligoryzomys_delticola
		Oligoryzomys_chacoensis
		Oligoryzomys_andinus
		Oligoryzomys_magellanicus
		Oligoryzomys_longicaudatus
		Oligoryzomys_flavescens
		Eremoryzomys_polius
		Cerradomys_subflavus
		Sooretamys_angouya
		Holochilus_brasiliensis
		Holochilus_chacarius
		Pseudoryzomys_simplex
		Lundomys_molitor
		Nectomys_squamipes
		Oryzomys_couesi
		Oryzomys_palustris
		Sigmodontomys_alfari
		Melanomys_caliginosus
		Nesoryzomys_indefessus
		Irenomys_tarsalis
		Euneomys_petersoni
		Euneomys_chinchilloides
		Andinomys_edax
		Punomys_kofordi
		Delomys_sublineatus
		Delomys_dorsalis
		Calomys_lepidus
		Calomys_sorellus
		Calomys_musculinus
		Calomys_laucha
		Calomys_tener
		Calomys_boliviae
		Calomys_callosus
		Calomys_venustus
		Calomys_hummelincki
		Eligmodontia_morgani
		Eligmodontia_puerulus
		Eligmodontia_moreni
		Eligmodontia_hirtipes
		Eligmodontia_bolsonensis
		Graomys_griseoflavus
		Graomys_domorum
		Andalgalomys_pearsoni
		Andalgalomys_olrogi
		Salinomys_delicatus
		Phyllotis_wolffsohni
		Tapecomys_primus
		Auliscomys_sublimis
		Auliscomys_pictus
		Auliscomys_boliviensis
		Galenomys_garleppi
		Loxodontomys_micropus
		Phyllotis_osilae
		Phyllotis_alisosiensis
		Phyllotis_anitae
		Phyllotis_caprinus
		Phyllotis_xanthopygus
		Phyllotis_darwini
		Phyllotis_amicus
		Paralomys_gerbillus
		Phyllotis_haggardi
		Phyllotis_andium
		Calassomys_apicalis
		Akodon_neocenus
		Wiedomys_pyrrhorhinos
		Juliomys_pictipes
		Abrothrix_olivaceus
		Abrothrix_andinus
		Abrothrix_jelskii
		Abrothrix_illuteus
		Abrothrix_longipilis
		Abrothrix_sanborni
		Notiomys_edwardsii
		Geoxus_valdivianus
		Chelemys_macronyx
		Mystromys_albicaudatus
		Saccostomus_campestris
		Beamys_hindei
		Cricetomys_gambianus
		Brachytarsomys_albicauda
		Gymnuromys_roberti
		Eliurus_myoxinus
		Brachyuromys_ramirohitra
		Nesomys_rufus
		Nesomys_audeberti
		Macrotarsomys_bastardi
		Calomyscus_baluchi
		Lophiomys_imhausi
		Pachyuromys_duprasi
		Psammomys_obesus
		Meriones_shawi
		Meriones_unguiculatus
		Sekeetamys_calurus
		Ammodillus_imbellis
		Microdillus_peeli
		Gerbillus_cheesmani
		Taterillus_arenarius
		Gerbilliscus_nigricaudus
		Gerbillurus_setzeri
		Desmodillus_auricularis
		Tatera_indica
		Notomys_amplus
		Conilurus_albipes
		Hydromys_chrysogaster
		Mastomys_coucha
		Mus_musculus
		Rhabdomys_pumilio
		Micromys_minutus
		Maxomys_inflatus
		Rattus_rattus
		Rattus_fuscipes
		Rattus_norvegicus
		Pedetes_surdaster
		Pedetes_capensis
		Anomalurus_pelii
		Anomalurus_derbianus
		Anomalurus_beecrofti
		Anomalurus_pusillus
		Microdipodops_pallidus
		Dipodomys_spectabilis
		Dipodomys_ordii
		Dipodomys_heermanni
		Dipodomys_merriami
		Thomomys_bulbivorus
		Thomomys_umbrinus
		Thomomys_bottae
		Geomys_pinetis
		Geomys_bursarius
		Geomys_arenarius
		Cratogeomys_castanops
		Liomys_salvini
		Heteromys_anomalus
		Perognathus_fasciatus
		Castor_fiber
		Castor_canadensis
		Hydrodamalis_gigas
		Trichechus_manatus
		Trichechus_senegalensis
		Trichechus_inunguis
		Dugong_dugon
		Loxodonta_africana
		Elephas_maximus
		Procavia_capensis
		Heterohyrax_brucei
		Dendrohyrax_validus
		Dendrohyrax_dorsalis
		Dendrohyrax_arboreus
		Orycteropus_afer
		Rhynchocyon_cirnei
		Rhynchocyon_chrysopygus
		Rhynchocyon_petersi
		Elephantulus_myurus
		Elephantulus_edwardii
		Macroscelides_proboscideus
		Petrodromus_tetradactylus
		Elephantulus_rufescens
		Elephantulus_brachyrhynchus
		Elephantulus_intufi
		Elephantulus_rupestris
		Potamogale_velox
		Limnogale_mergulus
		Microgale_talazaci
		Microgale_longicaudata
		Microgale_cowani
		Oryzorictes_tetradactylus
		Tenrec_ecaudatus
		Hemicentetes_semispinosus
		Setifer_setosus
		Echinops_telfairi
		Eremitalpa_granti
		Amblysomus_hottentotus
		Calcochloris_obtusirostris
		Chrysospalax_trevelyani
		Chrysochloris_asiatica
		Dasypus_hybridus
		Dasypus_novemcinctus
		Dasypus_kappleri
		Dasypus_septemcinctus
		Zaedyus_pichiy
		Euphractus_sexcinctus
		Chaetophractus_vellerosus
		Chaetophractus_villosus
		Chlamyphorus_truncatus
		Tolypeutes_matacus
		Priodontes_maximus
		Cabassous_unicinctus
		Tamandua_tetradactyla
		Tamandua_mexicana
		Myrmecophaga_tridactyla
		Cyclopes_didactylus
		Choloepus_hoffmanni
		Choloepus_didactylus
		Bradypus_tridactylus
		Bradypus_variegatus
		Rhyncholestes_raphanurus
		Caenolestes_fuliginosus
		Glironia_venusta
		Monodelphis_domestica
		Gracilinanus_microtarsus
		Metachirus_nudicaudatus
		Didelphis_virginiana
		Didelphis_marsupialis
		Didelphis_albiventris
		Chironectes_minimus
		Caluromys_philander
		Dromiciops_gliroides
		Notoryctes_typhlops
		Notoryctes_caurinus
		Macrotis_lagotis
		Isoodon_macrourus
		Isoodon_obesulus
		Perameles_gunnii
		Perameles_nasuta
		Sarcophilus_harrisii
		Dasyurus_maculatus
		Dasyurus_viverrinus
		Dasyuroides_byrnei
		Dasycercus_cristicauda
		Antechinus_flavipes
		Thylacinus_cynocephalus
		Myrmecobius_fasciatus
		Phascolarctos_cinereus
		Vombatus_ursinus
		Lasiorhinus_latifrons
		Cercartetus_concinnus
		Trichosurus_vulpecula
		Spilocuscus_maculatus
		Phalanger_sericeus
		Phalanger_orientalis
		Hypsiprymnodon_moschatus
		Thylogale_billardierii
		Petrogale_lateralis
		Petrogale_penicillata
		Dendrolagus_goodfellowi
		Dendrolagus_matschiei
		Dendrolagus_bennettianus
		Dendrolagus_lumholtzi
		Macropus_fuliginosus
		Macropus_giganteus
		Macropus_antilopinus
		Macropus_robustus
		Macropus_rufus
		Macropus_rufogriseus
		Macropus_eugenii
		Macropus_agilis
		Macropus_parryi
		Macropus_parma
		Macropus_irma
		Dendrolagus_ursinus
		Potorous_longipes
		Potorous_tridactylus
		Bettongia_penicillata
		Bettongia_gaimardi
		Aepyprymnus_rufescens
		Pseudocheirus_peregrinus
		Petauroides_volans
		Petaurus_australis
		Petaurus_norfolcensis
		Petaurus_breviceps
	;
END;
BEGIN TREES;
	TRANSLATE
		1	Zaglossus_bruijnii,
		2	Tachyglossus_aculeatus,
		3	Ornithorhynchus_anatinus,
		4	Solenodon_paradoxus,
		5	Solenodon_cubanus,
		6	Galemys_pyrenaicus,
		7	Scapanus_latimanus,
		8	Scalopus_aquaticus,
		9	Talpa_europaea,
		10	Euroscaptor_mizura,
		11	Euroscaptor_micrura,
		12	Mogera_tokudae,
		13	Mogera_imaizumii,
		14	Mogera_wogura,
		15	Euroscaptor_subanura,
		16	Condylura_cristata,
		17	Hylomys_suillus,
		18	Echinosorex_gymnura,
		19	Erinaceus_europaeus,
		20	Paraechinus_micropus,
		21	Hemiechinus_auritus,
		22	Atelerix_algirus,
		23	Scutisorex_somereni,
		24	Suncus_madagascariensis,
		25	Crocidura_crenata,
		26	Crocidura_canariensis,
		27	Sorex_araneus,
		28	Sorex_minutus,
		29	Cryptotis_parva,
		30	Blarina_hylophaga,
		31	Notiosorex_crawfordi,
		32	Smutsia_gigantea,
		33	Phataginus_tricuspis,
		34	Manis_pentadactyla,
		35	Urocyon_cinereoargenteus,
		36	Vulpes_lagopus,
		37	Vulpes_zerda,
		38	Vulpes_vulpes,
		39	Otocyon_megalotis,
		40	Nyctereutes_procyonoides,
		41	Lycaon_pictus,
		42	Chrysocyon_brachyurus,
		43	Canis_mesomelas,
		44	Canis_simensis,
		45	Canis_latrans,
		46	Canis_aureus,
		47	Canis_lupus,
		48	Cuon_alpinus,
		49	Canis_adustus,
		50	Pseudalopex_gymnocercus,
		51	Speothos_venaticus,
		52	Cerdocyon_thous,
		53	Neomonachus_tropicalis,
		54	Monachus_monachus,
		55	Mirounga_leonina,
		56	Mirounga_angustirostris,
		57	Lobodon_carcinophaga,
		58	Leptonychotes_weddellii,
		59	Ommatophoca_rossii,
		60	Hydrurga_leptonyx,
		61	Erignathus_barbatus,
		62	Pagophilus_groenlandicus,
		63	Phoca_vitulina,
		64	Pusa_hispida,
		65	Halichoerus_grypus,
		66	Cystophora_cristata,
		67	Odobenus_rosmarus,
		68	Callorhinus_ursinus,
		69	Zalophus_californianus,
		70	Zalophus_japonicus,
		71	Eumetopias_jubatus,
		72	Arctocephalus_pusillus,
		73	Neophoca_cinerea,
		74	Otaria_bryonia,
		75	Arctocephalus_tropicalis,
		76	Arctocephalus_forsteri,
		77	Arctocephalus_australis,
		78	Mydaus_javanensis,
		79	Spilogale_gracilis,
		80	Mephitis_mephitis,
		81	Conepatus_humboldtii,
		82	Conepatus_chinga,
		83	Potos_flavus,
		84	Procyon_lotor,
		85	Procyon_cancrivorus,
		86	Bassariscus_astutus,
		87	Nasua_nasua,
		88	Nasua_narica,
		89	Bassaricyon_alleni,
		90	Taxidea_taxus,
		91	Meles_meles,
		92	Meles_anakuma,
		93	Arctonyx_collaris,
		94	Mellivora_capensis,
		95	Gulo_gulo,
		96	Martes_flavigula,
		97	Martes_foina,
		98	Martes_zibellina,
		99	Martes_martes,
		100	Martes_americana,
		101	Martes_pennanti,
		102	Eira_barbara,
		103	Melogale_orientalis,
		104	Neovison_vison,
		105	Mustela_frenata,
		106	Mustela_felipei,
		107	Mustela_erminea,
		108	Mustela_nivalis,
		109	Mustela_sibirica,
		110	Mustela_nigripes,
		111	Mustela_lutreolina,
		112	Mustela_putorius,
		113	Ictonyx_libyca,
		114	Galictis_vittata,
		115	Lyncodon_patagonicus,
		116	Galictis_cuja,
		117	Pteronura_brasiliensis,
		118	Lontra_longicaudis,
		119	Lontra_provocax,
		120	Lontra_canadensis,
		121	Enhydra_lutris,
		122	Lutra_maculicollis,
		123	Lutra_lutra,
		124	Aonyx_cinerea,
		125	Lutrogale_perspicillata,
		126	Aonyx_capensis,
		127	Ailurus_fulgens,
		128	Ursus_maritimus,
		129	Ursus_arctos,
		130	Melursus_ursinus,
		131	Ursus_thibetanus,
		132	Ursus_americanus,
		133	Helarctos_malayanus,
		134	Ailuropoda_melanoleuca,
		135	Nandinia_binotata,
		136	Hyaena_hyaena,
		137	Hyaena_brunnea,
		138	Proteles_cristata,
		139	Crocuta_crocuta,
		140	Eupleres_goudotii,
		141	Salanoia_concolor,
		142	Galidictis_fasciata,
		143	Galidia_elegans,
		144	Cryptoprocta_ferox,
		145	Herpestes_vitticollis,
		146	Herpestes_javanicus,
		147	Herpestes_edwardsii,
		148	Herpestes_ichneumon,
		149	Ichneumia_albicauda,
		150	Cynictis_penicillata,
		151	Bdeogale_crassicauda,
		152	Crossarchus_obscurus,
		153	Helogale_parvula,
		154	Liberiictis_kuhni,
		155	Mungos_mungo,
		156	Suricata_suricatta,
		157	Genetta_maculata,
		158	Genetta_tigrina,
		159	Genetta_genetta,
		160	Genetta_servalina,
		161	Viverricula_indica,
		162	Viverra_tangalunga,
		163	Viverra_zibetha,
		164	Civettictis_civetta,
		165	Macrogalidia_musschenbroekii,
		166	Cynogale_bennettii,
		167	Hemigalus_derbyanus,
		168	Paradoxurus_hermaphroditus,
		169	Arctictis_binturong,
		170	Prionodon_pardicolor,
		171	Prionodon_linsang,
		172	Neofelis_nebulosa,
		173	Panthera_tigris,
		174	Panthera_onca,
		175	Panthera_uncia,
		176	Panthera_pardus,
		177	Panthera_leo,
		178	Lynx_rufus,
		179	Lynx_lynx,
		180	Lynx_canadensis,
		181	Acinonyx_jubatus,
		182	Puma_concolor,
		183	Felis_catus,
		184	Felis_silvestris,
		185	Leopardus_pardalis,
		186	Leopardus_wiedii,
		187	Leopardus_tigrinus,
		188	Prionailurus_bengalensis,
		189	Leptailurus_serval,
		190	Caracal_caracal,
		191	Equus_africanus,
		192	Equus_grevyi,
		193	Equus_quagga,
		194	Equus_zebra,
		195	Equus_hemionus,
		196	Equus_caballus,
		197	Equus_ferus,
		198	Tapirus_indicus,
		199	Tapirus_terrestris,
		200	Tapirus_bairdii,
		201	Rhinoceros_unicornis,
		202	Rhinoceros_sondaicus,
		203	Dicerorhinus_sumatrensis,
		204	Diceros_bicornis,
		205	Ceratotherium_simum,
		206	Vicugna_pacos,
		207	Vicugna_vicugna,
		208	Lama_glama,
		209	Camelus_dromedarius,
		210	Camelus_ferus,
		211	Tayassu_pecari,
		212	Pecari_tajacu,
		213	Sus_scrofa,
		214	Sus_barbatus,
		215	Potamochoerus_porcus,
		216	Phacochoerus_africanus,
		217	Phacochoerus_aethiopicus,
		218	Hylochoerus_meinertzhageni,
		219	Babyrousa_babyrussa,
		220	Hippopotamus_amphibius,
		221	Choeropsis_liberiensis,
		222	Indopacetus_pacificus,
		223	Kogia_sima,
		224	Kogia_breviceps,
		225	Physeter_macrocephalus,
		226	Platanista_gangetica,
		227	Pontoporia_blainvillei,
		228	Inia_geoffrensis,
		229	Inia_araguaiaensis,
		230	Lipotes_vexillifer,
		231	Delphinapterus_leucas,
		232	Mesoplodon_bowdoini,
		233	Monodon_monoceros,
		234	Neophocaena_phocaenoides,
		235	Phocoenoides_dalli,
		236	Phocoena_phocoena,
		237	Phocoena_spinipinnis,
		238	Phocoena_dioptrica,
		239	Lagenorhynchus_acutus,
		240	Lagenorhynchus_albirostris,
		241	Orcinus_orca,
		242	Orcaella_brevirostris,
		243	Grampus_griseus,
		244	Pseudorca_crassidens,
		245	Peponocephala_electra,
		246	Globicephala_melas,
		247	Globicephala_macrorhynchus,
		248	Feresa_attenuata,
		249	Steno_bredanensis,
		250	Sotalia_guianensis,
		251	Sotalia_fluviatilis,
		252	Tursiops_truncatus,
		253	Stenella_attenuata,
		254	Lagenodelphis_hosei,
		255	Stenella_longirostris,
		256	Sousa_chinensis,
		257	Tursiops_aduncus,
		258	Stenella_frontalis,
		259	Stenella_coeruleoalba,
		260	Stenella_clymene,
		261	Delphinus_delphis,
		262	Delphinus_capensis,
		263	Lagenorhynchus_obscurus,
		264	Lagenorhynchus_obliquidens,
		265	Lagenorhynchus_cruciger,
		266	Lagenorhynchus_australis,
		267	Cephalorhynchus_hectori,
		268	Cephalorhynchus_heavisidii,
		269	Cephalorhynchus_eutropia,
		270	Cephalorhynchus_commersonii,
		271	Berardius_bairdii,
		272	Berardius_arnuxii,
		273	Mesoplodon_bidens,
		274	Ziphius_cavirostris,
		275	Mesoplodon_stejnegeri,
		276	Hyperoodon_planifrons,
		277	Hyperoodon_ampullatus,
		278	Mesoplodon_hectori,
		279	Mesoplodon_carlhubbsi,
		280	Mesoplodon_layardii,
		281	Mesoplodon_mirus,
		282	Mesoplodon_europaeus,
		283	Mesoplodon_densirostris,
		284	Mesoplodon_grayi,
		285	Tasmacetus_shepherdi,
		286	Eubalaena_glacialis,
		287	Eubalaena_japonica,
		288	Balaenoptera_physalus,
		289	Balaenoptera_musculus,
		290	Balaenoptera_omurai,
		291	Balaenoptera_borealis,
		292	Balaenoptera_edeni,
		293	Mesoplodon_perrini,
		294	Balaenoptera_bonaerensis,
		295	Mesoplodon_peruvianus,
		296	Lissodelphis_peronii,
		297	Lissodelphis_borealis,
		298	Balaena_mysticetus,
		299	Caperea_marginata,
		300	Balaenoptera_acutorostrata,
		301	Mesoplodon_ginkgodens,
		302	Megaptera_novaeangliae,
		303	Eschrichtius_robustus,
		304	Moschiola_meminna,
		305	Moschiola_indica,
		306	Tragulus_javanicus,
		307	Tragulus_kanchil,
		308	Tragulus_napu,
		309	Okapia_johnstoni,
		310	Giraffa_camelopardalis,
		311	Antilocapra_americana,
		312	Muntiacus_muntjak,
		313	Dama_dama,
		314	Elaphurus_davidianus,
		315	Rusa_unicolor,
		316	Cervus_elaphus,
		317	Axis_calamianensis,
		318	Axis_axis,
		319	Rangifer_tarandus,
		320	Odocoileus_virginianus,
		321	Odocoileus_hemionus,
		322	Mazama_gouazoubira,
		323	Blastocerus_dichotomus,
		324	Pudu_puda,
		325	Hydropotes_inermis,
		326	Capreolus_capreolus,
		327	Alces_alces,
		328	Moschus_moschiferus,
		329	Moschus_berezovskii,
		330	Boselaphus_tragocamelus,
		331	Tetracerus_quadricornis,
		332	Tragelaphus_imberbis,
		333	Tragelaphus_angasii,
		334	Tragelaphus_scriptus,
		335	Tragelaphus_eurycerus,
		336	Tragelaphus_spekii,
		337	Tragelaphus_buxtoni,
		338	Tragelaphus_strepsiceros,
		339	Syncerus_caffer,
		340	Bubalus_mindorensis,
		341	Bubalus_depressicornis,
		342	Bubalus_arnee,
		343	Bos_gaurus,
		344	Bos_taurus,
		345	Bos_indicus,
		346	Bison_bonasus,
		347	Bos_mutus,
		348	Bos_grunniens,
		349	Bison_bison,
		350	Nesotragus_moschatus,
		351	Aepyceros_melampus,
		352	Pelea_capreolus,
		353	Redunca_fulvorufula,
		354	Redunca_redunca,
		355	Redunca_arundinum,
		356	Kobus_megaceros,
		357	Kobus_leche,
		358	Kobus_vardonii,
		359	Kobus_kob,
		360	Kobus_ellipsiprymnus,
		361	Ourebia_ourebi,
		362	Raphicerus_melanotis,
		363	Raphicerus_sharpei,
		364	Raphicerus_campestris,
		365	Madoqua_kirkii,
		366	Madoqua_guentheri,
		367	Saiga_tatarica,
		368	Nanger_granti,
		369	Eudorcas_rufifrons,
		370	Gazella_dorcas,
		371	Gazella_gazella,
		372	Gazella_spekei,
		373	Antilope_cervicapra,
		374	Litocranius_walleri,
		375	Antidorcas_marsupialis,
		376	Neotragus_pygmaeus,
		377	Oreotragus_oreotragus,
		378	Philantomba_monticola,
		379	Sylvicapra_grimmia,
		380	Cephalophus_silvicultor,
		381	Cephalophus_dorsalis,
		382	Cephalophus_leucogaster,
		383	Cephalophus_nigrifrons,
		384	Cephalophus_natalensis,
		385	Cephalophus_weynsi,
		386	Ovibos_moschatus,
		387	Capricornis_crispus,
		388	Ovis_canadensis,
		389	Ovis_orientalis,
		390	Ovis_aries,
		391	Ovis_ammon,
		392	Capra_ibex,
		393	Capra_hircus,
		394	Pseudois_nayaur,
		395	Myotragus_balearicus,
		396	Oreamnos_americanus,
		397	Rupicapra_rupicapra,
		398	Ammotragus_lervia,
		399	Connochaetes_taurinus,
		400	Connochaetes_gnou,
		401	Damaliscus_pygargus,
		402	Damaliscus_lunatus,
		403	Beatragus_hunteri,
		404	Alcelaphus_buselaphus,
		405	Hippotragus_niger,
		406	Hippotragus_equinus,
		407	Oryx_dammah,
		408	Oryx_leucoryx,
		409	Oryx_gazella,
		410	Oryx_beisa,
		411	Rhinopoma_hardwickii,
		412	Rhinopoma_microphyllum,
		413	Lavia_frons,
		414	Megaderma_spasma,
		415	Rhinolophus_hipposideros,
		416	Asellia_tridens,
		417	Hipposideros_caffer,
		418	Hipposideros_diadema,
		419	Cynopterus_titthaecheilus,
		420	Cynopterus_brachyotis,
		421	Epomops_franqueti,
		422	Hypsignathus_monstrosus,
		423	Rousettus_aegyptiacus,
		424	Eidolon_helvum,
		425	Pteropus_giganteus,
		426	Pteropus_rufus,
		427	Pteropus_vampyrus,
		428	Macroglossus_minimus,
		429	Myzopoda_aurita,
		430	Mystacina_tuberculata,
		431	Thyroptera_discifera,
		432	Noctilio_leporinus,
		433	Pteronotus_parnellii,
		434	Mormoops_megalophylla,
		435	Micronycteris_microtis,
		436	Anoura_caudifer,
		437	Glossophaga_soricina,
		438	Glossophaga_morenoi,
		439	Phylloderma_stenops,
		440	Phyllostomus_discolor,
		441	Lonchorhina_inusitata,
		442	Chrotopterus_auritus,
		443	Vampyrum_spectrum,
		444	Lonchophylla_inexpectata,
		445	Carollia_perspicillata,
		446	Artibeus_jamaicensis,
		447	Artibeus_planirostris,
		448	Pygoderma_bilabiatum,
		449	Vampyressa_pusilla,
		450	Sturnira_erythromos,
		451	Sturnira_aratathomasi,
		452	Rhinophylla_pumilio,
		453	Lonchorhina_orinocensis,
		454	Lonchorhina_fernandezi,
		455	Lonchorhina_marinkellei,
		456	Lonchorhina_aurita,
		457	Diphylla_ecaudata,
		458	Desmodus_rotundus,
		459	Diaemus_youngi,
		460	Macrotus_waterhousii,
		461	Macrotus_californicus,
		462	Nyctinomops_macrotis,
		463	Molossus_molossus,
		464	Promops_nasutus,
		465	Molossops_temminckii,
		466	Cynomops_planirostris,
		467	Eumops_perotis,
		468	Tadarida_brasiliensis,
		469	Molossus_currentium,
		470	Myotis_daubentonii,
		471	Myotis_keaysi,
		472	Myotis_velifer,
		473	Myotis_chiloensis,
		474	Myotis_lucifugus,
		475	Myotis_evotis,
		476	Eptesicus_nilssonii,
		477	Eptesicus_serotinus,
		478	Histiotus_montanus,
		479	Histiotus_magellanicus,
		480	Eptesicus_diminutus,
		481	Lasionycteris_noctivagans,
		482	Pipistrellus_pipistrellus,
		483	Nyctalus_noctula,
		484	Vespertilio_murinus,
		485	Chalinolobus_tuberculatus,
		486	Neoromicia_nana,
		487	Lasiurus_cinereus,
		488	Lasiurus_ega,
		489	Antrozous_pallidus,
		490	Otonycteris_hemprichii,
		491	Plecotus_auritus,
		492	Euderma_maculatum,
		493	Barbastella_barbastellus,
		494	Miniopterus_schreibersii,
		495	Nycteris_javanica,
		496	Nycteris_thebaica,
		497	Saccopteryx_bilineata,
		498	Peropteryx_leucoptera,
		499	Balantiopteryx_plicata,
		500	Galeopterus_variegatus,
		501	Cynocephalus_volans,
		502	Nycticebus_coucang,
		503	Loris_tardigradus,
		504	Otolemur_garnettii,
		505	Otolemur_crassicaudatus,
		506	Galago_senegalensis,
		507	Euoticus_elegantulus,
		508	Perodicticus_potto,
		509	Arctocebus_calabarensis,
		510	Daubentonia_madagascariensis,
		511	Indri_indri,
		512	Propithecus_diadema,
		513	Propithecus_verreauxi,
		514	Propithecus_coquereli,
		515	Avahi_laniger,
		516	Varecia_variegata,
		517	Lemur_catta,
		518	Hapalemur_griseus,
		519	Eulemur_macaco,
		520	Eulemur_rubriventer,
		521	Eulemur_mongoz,
		522	Eulemur_collaris,
		523	Eulemur_fulvus,
		524	Eulemur_sanfordi,
		525	Eulemur_albifrons,
		526	Lepilemur_mustelinus,
		527	Cheirogaleus_medius,
		528	Microcebus_murinus,
		529	Microcebus_rufus,
		530	Tarsius_syrichta,
		531	Pithecia_irrorata,
		532	Pithecia_monachus,
		533	Pithecia_pithecia,
		534	Cacajao_melanocephalus,
		535	Callicebus_moloch,
		536	Leontocebus_nigricollis,
		537	Saguinus_oedipus,
		538	Leontopithecus_rosalia,
		539	Mico_humeralifer,
		540	Callithrix_jacchus,
		541	Cebuella_pygmaea,
		542	Saimiri_sciureus,
		543	Cebus_olivaceus,
		544	Cebus_albifrons,
		545	Cebus_capucinus,
		546	Aotus_azarae,
		547	Aotus_nancymaae,
		548	Alouatta_seniculus,
		549	Alouatta_caraya,
		550	Alouatta_palliata,
		551	Alouatta_pigra,
		552	Lagothrix_lagotricha,
		553	Brachyteles_hypoxanthus,
		554	Brachyteles_arachnoides,
		555	Ateles_geoffroyi,
		556	Ateles_fusciceps,
		557	Ateles_paniscus,
		558	Ateles_chamek,
		559	Ateles_belzebuth,
		560	Symphalangus_syndactylus,
		561	Hylobates_pileatus,
		562	Hylobates_lar,
		563	Hylobates_muelleri,
		564	Hylobates_moloch,
		565	Hylobates_klossii,
		566	Hylobates_agilis,
		567	Nomascus_concolor,
		568	Nomascus_gabriellae,
		569	Nomascus_leucogenys,
		570	Hoolock_hoolock,
		571	Pongo_pygmaeus,
		572	Pongo_abelii,
		573	Pan_troglodytes,
		574	Pan_paniscus,
		575	Homo_sapiens,
		576	Gorilla_gorilla,
		577	Gorilla_beringei,
		578	Semnopithecus_schistaceus,
		579	Trachypithecus_cristatus,
		580	Trachypithecus_phayrei,
		581	Semnopithecus_entellus,
		582	Presbytis_rubicunda,
		583	Presbytis_melalophos,
		584	Rhinopithecus_bieti,
		585	Rhinopithecus_roxellana,
		586	Nasalis_larvatus,
		587	Colobus_guereza,
		588	Colobus_vellerosus,
		589	Macaca_leonina,
		590	Macaca_sinica,
		591	Macaca_silenus,
		592	Macaca_nemestrina,
		593	Macaca_maura,
		594	Macaca_radiata,
		595	Macaca_fascicularis,
		596	Macaca_arctoides,
		597	Macaca_nigra,
		598	Macaca_fuscata,
		599	Macaca_mulatta,
		600	Macaca_sylvanus,
		601	Theropithecus_gelada,
		602	Papio_cynocephalus,
		603	Papio_papio,
		604	Papio_hamadryas,
		605	Papio_anubis,
		606	Lophocebus_aterrimus,
		607	Lophocebus_albigena,
		608	Cercocebus_atys,
		609	Mandrillus_sphinx,
		610	Mandrillus_leucophaeus,
		611	Cercopithecus_mitis,
		612	Cercopithecus_ascanius,
		613	Erythrocebus_patas,
		614	Chlorocebus_pygerythrus,
		615	Chlorocebus_aethiops,
		616	Chlorocebus_cynosuros,
		617	Chlorocebus_sabaeus,
		618	Miopithecus_talapoin,
		619	Ptilocercus_lowii,
		620	Tupaia_glis,
		621	Tupaia_nicobarica,
		622	Urogale_everetti,
		623	Tupaia_tana,
		624	Dendrogale_melanura,
		625	Anathana_ellioti,
		626	Sylvilagus_audubonii,
		627	Oryctolagus_cuniculus,
		628	Pentalagus_furnessi,
		629	Lepus_californicus,
		630	Lepus_alleni,
		631	Lepus_townsendii,
		632	Lepus_timidus,
		633	Lepus_europaeus,
		634	Lepus_americanus,
		635	Nesolagus_timminsi,
		636	Nesolagus_netscheri,
		637	Ochotona_hyperborea,
		638	Ochotona_princeps,
		639	Muscardinus_avellanarius,
		640	Aplodontia_rufa,
		641	Ratufa_indica,
		642	Callosciurus_erythraeus,
		643	Tamias_striatus,
		644	Tamias_minimus,
		645	Spermophilus_dauricus,
		646	Ictidomys_tridecemlineatus,
		647	Cynomys_ludovicianus,
		648	Marmota_monax,
		649	Marmota_caligata,
		650	Marmota_marmota,
		651	Marmota_sibirica,
		652	Sciurus_anomalus,
		653	Sciurus_niger,
		654	Sciurus_carolinensis,
		655	Sciurus_griseus,
		656	Microsciurus_mimulus,
		657	Microsciurus_alfari,
		658	Microsciurus_flaviventer,
		659	Sciurus_vulgaris,
		660	Tamiasciurus_hudsonicus,
		661	Glaucomys_volans,
		662	Petaurista_leucogenys,
		663	Petaurista_philippensis,
		664	Petaurista_alborufus,
		665	Petaurista_grandis,
		666	Laonastes_aenigmamus,
		667	Atherurus_macrourus,
		668	Hystrix_javanica,
		669	Hystrix_cristata,
		670	Thryonomys_swinderianus,
		671	Heterocephalus_glaber,
		672	Heliophobius_argenteocinereus,
		673	Cryptomys_hottentotus,
		674	Georychus_capensis,
		675	Bathyergus_suillus,
		676	Cuniculus_paca,
		677	Myoprocta_acouchy,
		678	Dasyprocta_leporina,
		679	Dasyprocta_azarae,
		680	Hydrochoerus_hydrochaeris,
		681	Dolichotis_patagonum,
		682	Cavia_porcellus,
		683	Cavia_aperea,
		684	Erethizon_dorsatum,
		685	Coendou_prehensilis,
		686	Lagostomus_maximus,
		687	Chinchilla_lanigera,
		688	Chinchilla_chinchilla,
		689	Phyllomys_sulinus,
		690	Myocastor_coypus,
		691	Capromys_pilorides,
		692	Ctenomys_boliviensis,
		693	Ctenomys_talarum,
		694	Octodon_degus,
		695	Spalacopus_cyanus,
		696	Dipus_sagitta,
		697	Jaculus_orientalis,
		698	Jaculus_jaculus,
		699	Stylodipus_telum,
		700	Allactaga_euphratica,
		701	Allactaga_major,
		702	Zapus_princeps,
		703	Sicista_concolor,
		704	Spalax_leucodon,
		705	Rhizomys_pruinosus,
		706	Dicrostonyx_groenlandicus,
		707	Ondatra_zibethicus,
		708	Lemmus_sibiricus,
		709	Synaptomys_cooperi,
		710	Ellobius_talpinus,
		711	Microtus_arvalis,
		712	Microtus_pennsylvanicus,
		713	Microtus_ochrogaster,
		714	Microtus_chrotorrhinus,
		715	Microtus_oeconomus,
		716	Myodes_gapperi,
		717	Mesocricetus_auratus,
		718	Tscherskia_triton,
		719	Cricetus_cricetus,
		720	Cricetulus_migratorius,
		721	Cricetulus_longicaudatus,
		722	Cricetulus_barabensis,
		723	Phodopus_sungorus,
		724	Neotoma_fuscipes,
		725	Neotoma_lepida,
		726	Neotoma_floridana,
		727	Neotoma_albigula,
		728	Neotoma_mexicana,
		729	Neotoma_cinerea,
		730	Hodomys_alleni,
		731	Nelsonia_neotomodon,
		732	Xenomys_nelsoni,
		733	Ochrotomys_nuttalli,
		734	Reithrodontomys_creper,
		735	Reithrodontomys_mexicanus,
		736	Reithrodontomys_fulvescens,
		737	Reithrodontomys_sumichrasti,
		738	Reithrodontomys_megalotis,
		739	Reithrodontomys_humulis,
		740	Reithrodontomys_montanus,
		741	Isthmomys_pirrensis,
		742	Isthmomys_flavidus,
		743	Onychomys_torridus,
		744	Onychomys_leucogaster,
		745	Peromyscus_maniculatus,
		746	Peromyscus_leucopus,
		747	Megadontomys_thomasi,
		748	Peromyscus_yucatanicus,
		749	Peromyscus_guatemalensis,
		750	Peromyscus_mexicanus,
		751	Peromyscus_megalops,
		752	Peromyscus_melanophrys,
		753	Habromys_lepturus,
		754	Habromys_lophurus,
		755	Peromyscus_crinitus,
		756	Peromyscus_ochraventer,
		757	Peromyscus_truei,
		758	Peromyscus_difficilis,
		759	Peromyscus_attwateri,
		760	Peromyscus_furvus,
		761	Peromyscus_spicilegus,
		762	Peromyscus_boylii,
		763	Podomys_floridanus,
		764	Neotomodon_alstoni,
		765	Peromyscus_californicus,
		766	Peromyscus_eremicus,
		767	Osgoodomys_banderanus,
		768	Scotinomys_xerampelinus,
		769	Scotinomys_teguina,
		770	Baiomys_taylori,
		771	Baiomys_musculus,
		772	Tylomys_panamensis,
		773	Tylomys_mirae,
		774	Tylomys_watsoni,
		775	Tylomys_fulviventer,
		776	Tylomys_nudicaudus,
		777	Ototylomys_phyllotis,
		778	Nyctomys_sumichrasti,
		779	Chibchanomys_trichotis,
		780	Reithrodon_auritus,
		781	Rheomys_underwoodi,
		782	Rheomys_thomasi,
		783	Rheomys_mexicanus,
		784	Rheomys_raptor,
		785	Ichthyomys_pittieri,
		786	Ichthyomys_hydrobates,
		787	Ichthyomys_tweedii,
		788	Neusticomys_venezuelae,
		789	Neusticomys_ferreirai,
		790	Neusticomys_monticolus,
		791	Anotomys_leander,
		792	Chinchillula_sahamae,
		793	Sigmodon_leucotis,
		794	Sigmodon_fulviventer,
		795	Sigmodon_alleni,
		796	Sigmodon_ochrognathus,
		797	Sigmodon_hispidus,
		798	Rhipidomys_macconnelli,
		799	Rhipidomys_nitela,
		800	Rhipidomys_mastacalis,
		801	Rhipidomys_fulviventer,
		802	Rhipidomys_venustus,
		803	Rhipidomys_couesi,
		804	Rhipidomys_venezuelae,
		805	Rhipidomys_latimanus,
		806	Rhipidomys_austrinus,
		807	Aepeomys_lugens,
		808	Thomasomys_gracilis,
		809	Thomasomys_cinereus,
		810	Thomasomys_rhoadsi,
		811	Thomasomys_baeops,
		812	Thomasomys_aureus,
		813	Thomasomys_pyrrhonotus,
		814	Thomasomys_daphne,
		815	Thomasomys_oreas,
		816	Thomasomys_hylophilus,
		817	Thomasomys_paramorum,
		818	Chilomys_instans,
		819	Akodon_bogotensis,
		820	Blarinomys_breviceps,
		821	Scapteromys_tumidus,
		822	Scapteromys_meridionalis,
		823	Scapteromys_aquaticus,
		824	Kunsia_tomentosus,
		825	Thalpomys_lasiotis,
		826	Necromys_amoenus,
		827	Necromys_urichi,
		828	Necromys_lasiurus,
		829	Necromys_temchuki,
		830	Necromys_obscurus,
		831	Necromys_lactens,
		832	Akodon_mimus,
		833	Akodon_azarae,
		834	Akodon_boliviensis,
		835	Akodon_subfuscus,
		836	Akodon_lutescens,
		837	Akodon_cursor,
		838	Akodon_simulator,
		839	Akodon_albiventer,
		840	Akodon_mollis,
		841	Akodon_torques,
		842	Akodon_aerosus,
		843	Deltamys_kempi,
		844	Thaptomys_nigrita,
		845	Oxymycterus_delator,
		846	Oxymycterus_paramensis,
		847	Oxymycterus_rufus,
		848	Oxymycterus_inca,
		849	Zygodontomys_brevicauda,
		850	Oecomys_concolor,
		851	Oecomys_roberti,
		852	Oecomys_bicolor,
		853	Oecomys_superans,
		854	Oecomys_trinitatis,
		855	Oecomys_mamorae,
[truncated: 284 more rows]
